## 31 **Abstract**

32 Infection with *Plasmodium falciparum* enhances extracellular vesicles (EVs)  
33 production in parasitized red blood cells (pRBC), an important mechanism for  
34 parasite-to-parasite communication during the asexual intraerythrocytic life cycle.  
35 The endosomal sorting complex required for transport (ESCRT), and in particular  
36 the ESCRT-III sub-complex, participates in the formation of EVs in higher  
37 eukaryotes. However, RBCs have lost the majority of their organelles through the  
38 maturation process, including an important reduction in their vesicular network.  
39 Therefore, the mechanism of EV production in *P. falciparum*-infected RBCs  
40 remains to be elucidated. Here we demonstrate that *P. falciparum* possesses a  
41 functional ESCRT-III machinery that is activated by an alternative recruitment  
42 pathway involving the action of PfBro1 and PfVps32/PfVps60 proteins. Additionally,  
43 multivesicular bodies formation and membrane shedding, both reported  
44 mechanisms of EVs production, were reconstituted in the membrane model of  
45 giant unilamellar vesicles using the purified recombinant proteins. Moreover, the  
46 presence of PfVps32, PfVps60 and PfBro1 in EVs purified from a pRBC culture  
47 was confirmed by super-resolution microscopy. In accordance, disruption of the  
48 *Pfvps60* gene led to a reduction in the number of the produced EVs in the KO  
49 strain when compared with the parental 3D7 strain. Overall, our results increase  
50 the knowledge on the underlying molecular mechanisms during malaria  
51 pathogenesis and demonstrate that ESCRT-III *P. falciparum* proteins participate in  
52 EVs production.

53

## 54 **Keywords**

55 EVs, ESCRT-III, malaria, protein export

## 56 **Introduction**

57 *Plasmodium spp* is the parasite responsible for malaria, a disease that, despite the  
58 efforts done to control it, still represents a health problem worldwide particularly in  
59 developing countries [1]. During *Plasmodium* infection, an elevated number of  
60 extracellular vesicles (EVs) from numerous cellular sources are circulating in the  
61 plasma [2], the amount of which correlates with the severity of the disease [2-5].  
62 Despite of its high impact in the development of the pathology, the precise  
63 mechanism of EV formation in the infected red blood cells (RBCs) remains to be  
64 elucidated. One of the yet unsolved enigmas of malaria pathophysiology is how  
65 mature RBCs are able to release high amounts of EVs after *Plasmodium* infection,  
66 since they are biochemically simple compared to other eukaryotic cells and lack a  
67 normal vesicular network. It has been suggested that *Plasmodium* uses its own  
68 protein network to establish a vesicular trafficking for the export of an arsenal of  
69 virulence factors through which contributes to the establishment of the parasite into  
70 the host cells [6].

71 In higher eukaryotes, EVs are generated and transported to their final destination  
72 by the endomembrane system [7]. Trafficking within the endomembrane system is  
73 crucial for the functional communication between different compartments in  
74 eukaryotic cells [8]. Depending on their origin and size, EVs can be classified into  
75 two major classes: exosomes and microvesicles. Exosomes refer to endosome-

76 derived vesicles with a diameter typically of 30-50 nm that are generated following  
77 the fusion of multivesicular bodies (MVBs) with the plasma membrane. On the  
78 other hand, microvesicles are plasma membrane-derived vesicles which result  
79 from direct membrane shedding and exhibit a size from 100 nm up to 1  $\mu\text{m}$  [9].

80 The MVBs are shaped after the formation of intraluminal vesicles (ILVs) in early  
81 endosomes [10]. The genesis of ILVs relies on the sequential action of the  
82 endosomal sorting complex required for transport (ESCRT), which consists of four  
83 protein complexes termed ESCRT-0, ESCRT-I, ESCRT-II, ESCRT-III and a set of  
84 accessory proteins [11, 12]. The best-described mechanism of ESCRT action  
85 begins with the recognition of mono-ubiquitinated proteins by ESCRT-0 [13], which  
86 then activates the recruitment of ESCRT-I [14] and ESCRT-II [15] that are  
87 responsible for membrane deformation into buds [16, 17]. Finally, the  
88 polymerization of ESCRT-III begins with the binding of Vps20 to the invaginated  
89 membrane, which recruits the rest of the ESCRT-III members to the bud neck and  
90 the nascent vesicle is closed [16, 18, 19]. The dissociation and recycling of the  
91 machinery depends on the participation of the Vps4 AAA-ATPase [20]. Among all  
92 the sub-complexes, ESCRT-III (composed by Vps20, Snf7/Vps32, Vps24 and  
93 Vps2) and its accessory proteins (Vps4, Vta1, Vps60, ALIX) are also involved in  
94 other important membrane-scission mechanisms, including virus budding,  
95 cytokinesis, nuclear envelope remodeling and exosome biogenesis among others  
96 (see review in [21]). All of these processes share the same topology where the  
97 nascent vesicle buds away from the cytosol, contrary to the topology observed in  
98 clathrin-coated vesicles [22].

99 The ESCRT machinery is highly conserved across the eukaryotic lineage;  
100 however, strictly intracellular protists, like *Plasmodium spp*, are devoid of ESCRT-  
101 0, -I and -II sub complexes [23]. In the case of *Plasmodium* and other organisms  
102 that lack the full ESCRT machinery, it is plausible that other proteins trigger  
103 ESCRT-III activation. In this regard, ALIX, a Bro1-domain protein, binds directly to  
104 Vps32 and triggers the formation of ESCRT-III polymers, leading to ILVs formation  
105 in humans [24]. Whether a similar mechanism, alternative to the canonical ESCRT-  
106 III pathway, exists in *Plasmodium* remains to be determined.

107 Previous *in silico* assays showed that *Plasmodium falciparum*, the deadliest human  
108 malaria parasite species, possesses at least two putative proteins from the  
109 ESCRT-III complex: Vps2 and Vps32/Snf7 [23, 25]. Additionally, the ATPase Vps4,  
110 an accessory protein of the ESCRT-III complex, was found in the cytoplasm of *P.*  
111 *falciparum* during the trophozoite blood stage [26]. Moreover, PfVps4 retained its  
112 function in MVBs formation when transfected into *Toxoplasma gondii* and COS  
113 cells, thus strongly suggesting the existence of a functional ESCRT machinery in  
114 *P. falciparum* that mediates the production of MVBs [26].

115 Since *P. falciparum* lacks upstream ESCRT complexes, here we have  
116 demonstrated the presence of a Bro1-domain protein (PfBro1) involved in an  
117 alternative recruitment pathway. In addition, the action of PfBro1 and two Snf7  
118 homologues in membrane-buds formation was reconstituted using giant unilamellar  
119 vesicles (GUVs) as a model system [27] in which we have visualized the assembly  
120 sequence and the function of the proteins. Additionally, we have used a  
121 microinjection approach that allowed us to recreate the topology occurring in living

122 cells and to study EVs formation using the purified recombinant proteins from the  
123 parasite. Moreover, we were able to detect the presence of all studied proteins in  
124 EVs secreted by *P. falciparum*-infected RBCs and inactivate one ESCRT-III related  
125 gene, which confirms its participation in EV biogenesis. Overall, our findings  
126 provide an important insight into protein export in *Plasmodium*-infected RBCs  
127 mediated by the parasite and describe a molecular target with antibody  
128 susceptibility that can be part of future vaccination or therapeutic strategies.

## 129 **Results**

### 130 ***Plasmodium falciparum* possesses a Bro1 domain-containing protein**

131 A previous *in silico* study of the *P. falciparum* genome revealed the presence of  
132 only six out of the 26 ESCRT-machinery proteins present in humans. The study  
133 showed that the genome of *P. falciparum* encodes four Snf7-domain containing  
134 proteins [23], a conserved feature in all ESCRT-III members [28]. Based on our *in*  
135 *silico* Basic Local Alignment Search Tool (BLAST) analysis, the four proteins were  
136 denoted as PfVps32, PfVps60, PfVps2 and PfVps46 (S1 Table).

137 The absence of ESCRT-I- and -II-associated genes and of a Vps20 homologue in  
138 the genome of *P. falciparum*, suggested the existence of an alternative recruitment  
139 pathway in the parasite. Hence, we explored the presence of a Bro1 domain-  
140 containing protein in *P. falciparum* that could bind directly to the Snf7 candidates  
141 and trigger the activation of the ESCRT-III system in this parasite, similarly to the  
142 process regulated by ALIX in humans.

143 An *in silico* search of the *P. falciparum* genome (<http://www.plasmodb.org>) showed  
144 that the parasite has a unique Bro1-containing homologue termed  
145 PF3D7\_1224200 (hereafter referred to as PfBro1) with a 3175 bp open reading  
146 frame and carrying 4 introns. The open reading frame of PfBro1 encodes an 819  
147 amino acid protein with a predicted molecular mass of 98,714 Da. Our further  
148 assays revealed that the amino acid sequence of full-length PfBro1 had an identity  
149 of 21.8% with ALIX, whereas the Bro1 domain in PfBro1 exhibited a 23.6% identity  
150 with its human homologue. Despite of this low amino acid conservation, we  
151 identified several conserved residues of the two charged polar clusters which, in  
152 several Bro1 homologues, stabilize the Bro1 domain [29]. These residues include  
153 R51, Y70 and E116 from the first cluster, and E187 and K246 from the second  
154 cluster (S1 Fig). Importantly, PfBro1 showed the conservation of the residue I144  
155 (S1 Fig), which has been demonstrated to directly participate in the binding of  
156 Vps32 in *Saccharomyces cerevisiae* [29]. We then performed additional tertiary  
157 structure prediction assays, revealing that the full-length PfBro1 has a hypothetical  
158 hydrophobic tail in its C-terminal region (S2 Fig), which makes it a good candidate  
159 for the recruitment of ESCRT-III components at the level of the membrane.

### 160 **PfBro1 and PfVps32 are exported to the cytoplasm of the erythrocyte**

161 In order to continue our characterization of the ESCRT-III machinery in *P.*  
162 *falciparum*, we focused on resolving the putative role of three proteins: (1)  
163 PfVps32, the most abundant protein in the ESCRT machinery; (2) PfVps60, whose  
164 human homologue, CHMP5, is able to bind directly to Brox [30], a Bro1-containing  
165 protein found in exosomes of human urine [31], which trigger their redistribution to

166 membrane-enriched fractions [30]; and (3) PfBro1 as their potential recruiter and  
167 activator. Consequently, genes encoding the aforementioned proteins were  
168 synthesized and cloned into the appropriate vector to induce and purify the  
169 corresponding proteins (S3 Fig) which were used for the rest of the experiments.

170 Rabbit polyclonal antibodies against the purified recombinant proteins were  
171 generated and used to detect their presence in protein extracts obtained by  
172 detergent fractionation from *P. falciparum* cultures during the intraerythrocytic  
173 stage. PfVps32 was present in the saponin extracts containing RBC-cytosolic  
174 proteins, PfVps60 was found in the RIPA-fraction where most cytoskeletal  
175 components are present, and PfBro1 was found in the Triton X-100 extracts  
176 enriched in proteins from membranes and organelles (Fig 1a-c). Interestingly, while  
177 PfBro1 and PfVps32 migrated at the expected molecular weight (98 and 26 kDa,  
178 respectively), PfVps60 migrated at a higher molecular weight (46 kDa) than that  
179 calculated from its amino acid sequence (27 kDa) (Fig 1c, S3 Fig). This effect has  
180 been observed in other Snf7-containing proteins and is attributed to the high  
181 electric charge of the protein [32]. Western blot results indicated that PfVps32,  
182 PfVps60 and PfBro1 are expressed throughout the whole intraerythrocytic cycle  
183 (Fig 1a-d, 2a-c). PfVps60 and PfBro1 showed a similar expression pattern with a  
184 peak during the trophozoite stage, 32 h post invasion (hpi) (Fig 1d). On the other  
185 hand, the highest PfVps32 levels were observed at ring stages (0-16 hpi), with an  
186 important decrease towards the trophozoite stage (32-40 hpi) (Fig 1a, d).

187 Interestingly, antibodies against PfBro1 and PfVps60 detected more than one



188 band, which suggested a proteolytic processing of the proteins or its association in  
 189 a complex probably related with their function or degradation (S4 Fig).

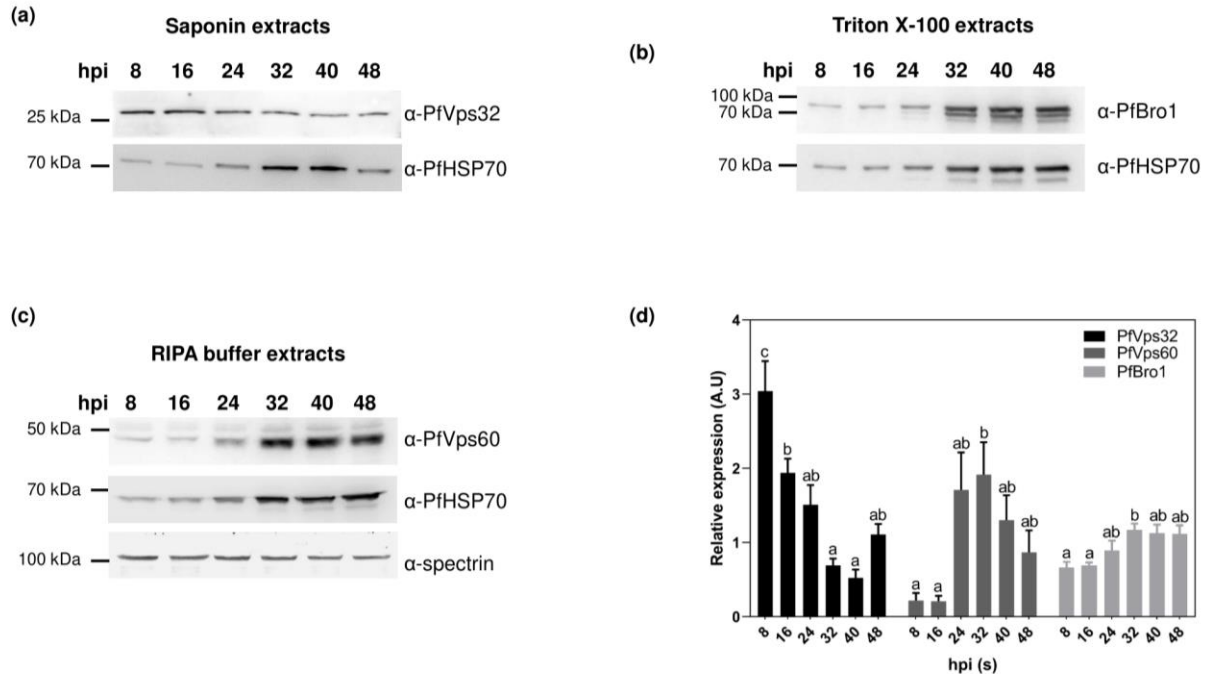

190

191 **Fig 1. Expression of PfVps32, PfVps60 and PfBro1 during the *P. falciparum***  
 192 **intraerythrocytic cycle.** Western blot analysis of *P. falciparum* in (a) saponin, (b)  
 193 Triton X-100 or (c) RIPA buffer protein extracts at different hpi to monitor protein  
 194 expression. (d) Intensities of the bands from PfVps32, PfVps60 and PfBro1  
 195 quantified by densitometry and normalized to those from PfHSP70, a ubiquitous  
 196 *Plasmodium* protein present at all times tested. Data are means  $\pm$  SE of 3 different  
 197 replicates. Significant differences ( $p < 0.05$ ) calculated using one-way ANOVA are  
 198 denoted by different letters: shared letters represent no statistically significant  
 199 difference.

200

201 Immunofluorescence assays showed that PfVps32, PfVps60 and PfBro1 were  
202 localized in the cytoplasm of the parasite (Fig 2). In the case of PfVps32, the  
203 protein was detected on the membrane of the infected RBC from 24 to 40 hpi (Fig  
204 2a), indicating its export during these times. Moreover, stage I to stage IV  
205 gametocytes stained positive for PfVps32 whereas PfBro1 and PfVps60 were  
206 absent from these stages. Additionally, punctate structures stained with anti-PfBro1  
207 and PfVps32 were observed in the cytoplasm of parasitized erythrocytes outside  
208 the parasitophorous vacuole (Fig 2c arrows). To examine whether these structures  
209 are exported to the parasitized RBC (pRBC) plasma membrane, lectins present in  
210 the RBC surface were labeled with wheat germ agglutinin (WGA). PfVps32 and  
211 PfBro1-labeled vesicles co-localized with the surface lectin (Fig 3, arrows).

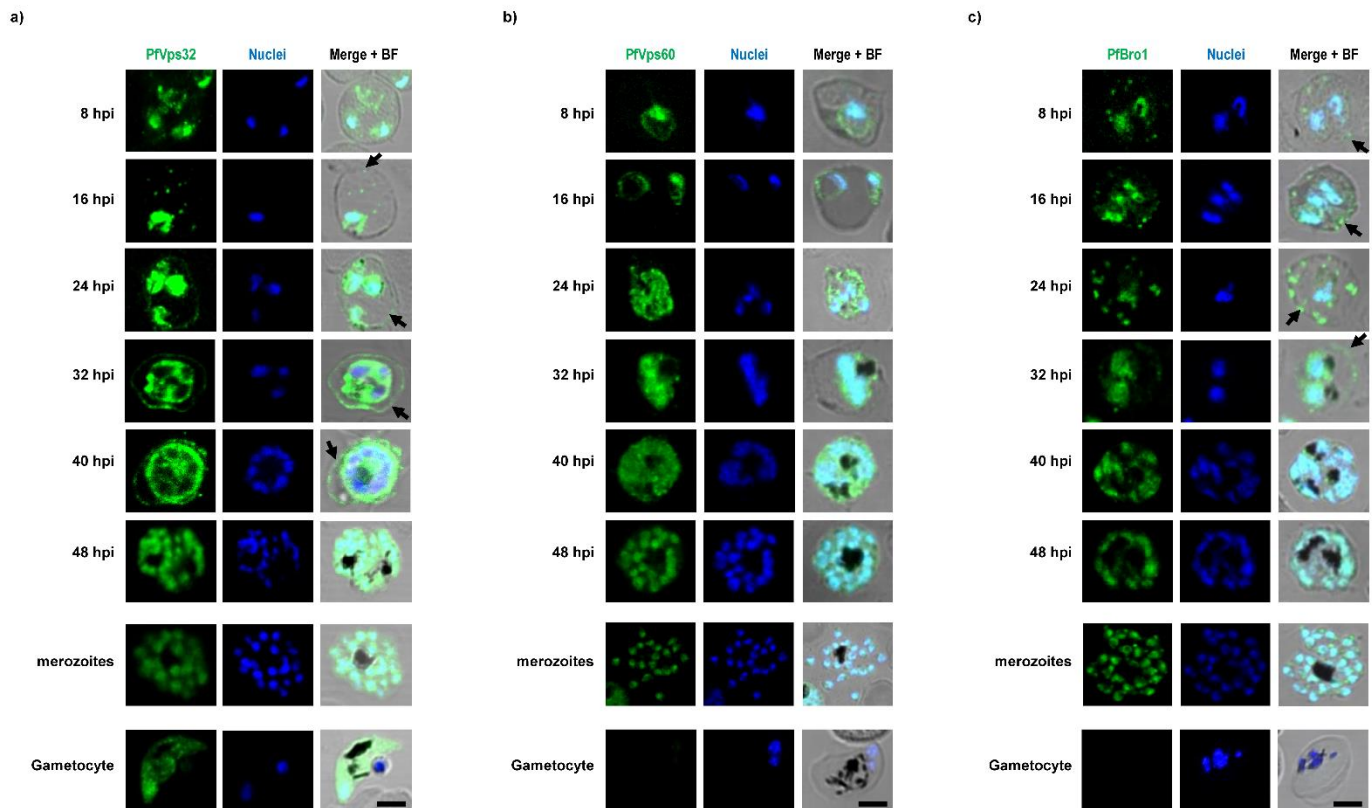

212

213 **Fig 2. Subcellular localization of PfVps32, PfVps60 and PfBro1 during the *P.***  
214 ***falciparum* intraerythrocytic cycle.** Human erythrocytes infected with *P.*  
215 *falciparum* were fixed at different hpi and **(a)** PfVps32, **(b)** PfVps60 and **(c)** PfBro1  
216 were detected by indirect immunofluorescence microscopy. For gametocyte  
217 imaging only one stage is showed (see S1 Text). Cell nuclei were visualized with  
218 Hoechst 33342 (blue). Fields were merged with bright field (BF) to assess  
219 localization. Scale bar: 5  $\mu$ m.

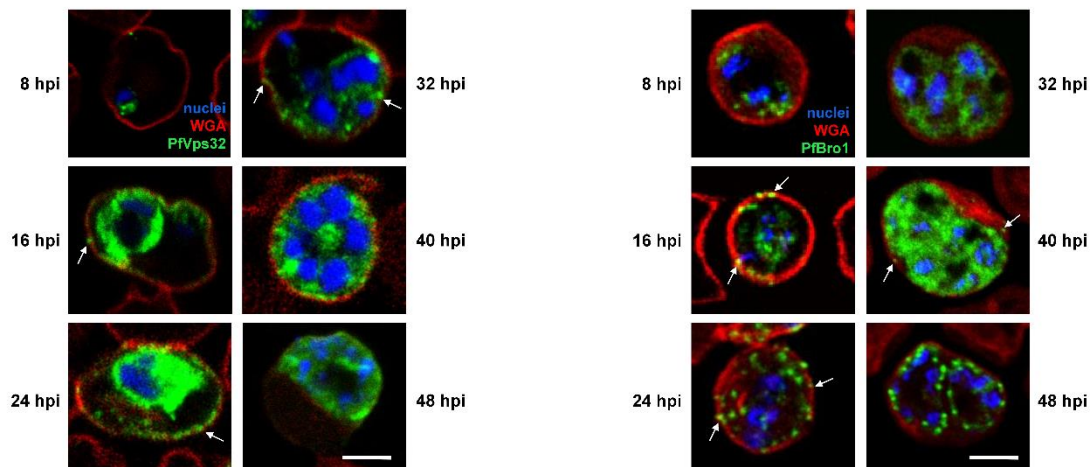

220

221 **Fig 3. Colocalization of PfBro1-labeled vesicles and WGA in the membrane of**  
222 **pRBCs.** Human erythrocytes were infected with *P. falciparum* and fixed at different  
223 hpi. PfBro1 (green) and WGA (red) were detected by indirect confocal  
224 immunofluorescence microscopy. Cell nuclei were visualized with Hoechst 33342  
225 (blue). Arrows show colocalization events of both proteins in the membrane of the  
226 pRBCs. Scale bar: 5  $\mu$ m

227 **PfVps32, PfVps60 and PfBro1 are present in extracellular vesicles produced**  
228 **by pRBCs**

229 The results showed above suggested that ESCRT-III proteins could be present in  
230 EVs derived from pRBCs. To explore further this hypothesis, we first evaluated by  
231 stochastic optical reconstruction microscopy (STORM) the presence of PfVps32,  
232 PfVps60 and PfBro1 in EVs derived from infected and non-infected RBCs. The  
233 sensitivity and resolution of this technique allowed us to detect the protein of  
234 interest in single EVs. Parasite proteins were observed in purified EVs from a 3%  
235 parasitemia pRBC culture at 40 hpi (Fig 4) and were absent in EVs from non-  
236 infected RBCs (data not shown), which confirmed our previous observations and  
237 reflected ESCRT-III participation in EVs biogenesis. Anti-GPA antibodies were  
238 used to detect EVs from RBC membrane origin. In this case, a significantly higher  
239 co-localization of GPA-enriched EVs with PfVps32 was observed when compared  
240 with the other two ESCRT proteins studied (Fig 4).

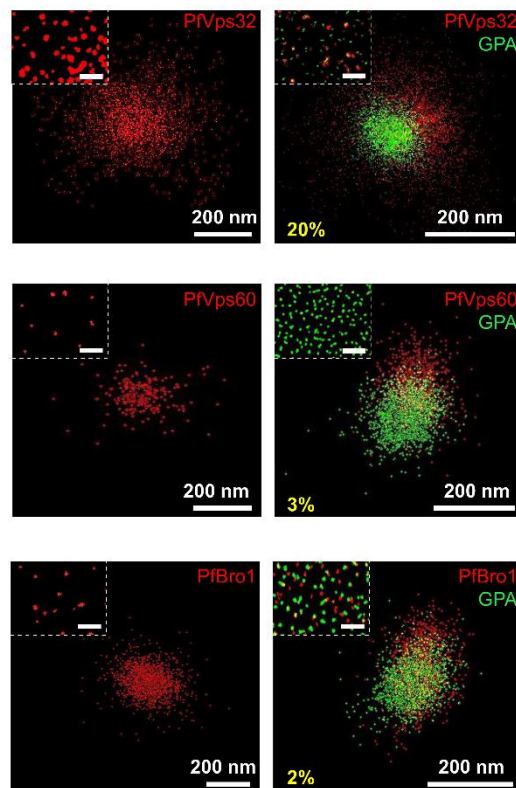

241 **Fig 4. PfVps32, PfVps60 and PfBro1 proteins are present in EVs produced by**  
242 **pRBCs.** STORM detection by immunostaining of either PfVps32, PfVps60 or  
243 PfBro1 and GPA in purified EVs derived from a 3% parasitemia pRBC culture at 40  
244 hpi. Insets show an enlarged region from the main image. In yellow characters is  
245 indicated the percentage of EVs where GPA overlaps with the corresponding  
246 parasite protein. Scale bar in insets: 2  $\mu$ m

247

248 As PfBro1 and PfVps60 exhibited a similar protein expression and pattern in the  
249 observed EVs, we hypothesize that these vesicles share a common origin.  
250 Therefore, the colocalization of individual PfBro1 and PfVps60 molecules in pRBCs  
251 was further interrogated by STORM. PfBro1 and PfVps60 were observed to  
252 colocalize throughout the whole intraerythrocytic cycle (Fig 5a). PfBro1 was mainly  
253 found in large vesicles, whereas PfVps60 exhibited a more homogeneous  
254 distribution in the cytoplasm of the parasite and inside the parasitophorous vacuole  
255 (PV) (Fig 5a). Interestingly, vesicles labeled with PfBro1 and PfVps60 were  
256 detected bound to the surface of non-infected RBCs (Fig 5b, arrows). In all  
257 experiments, pre-immune serum used as a control did not display any signal (data  
258 not shown).

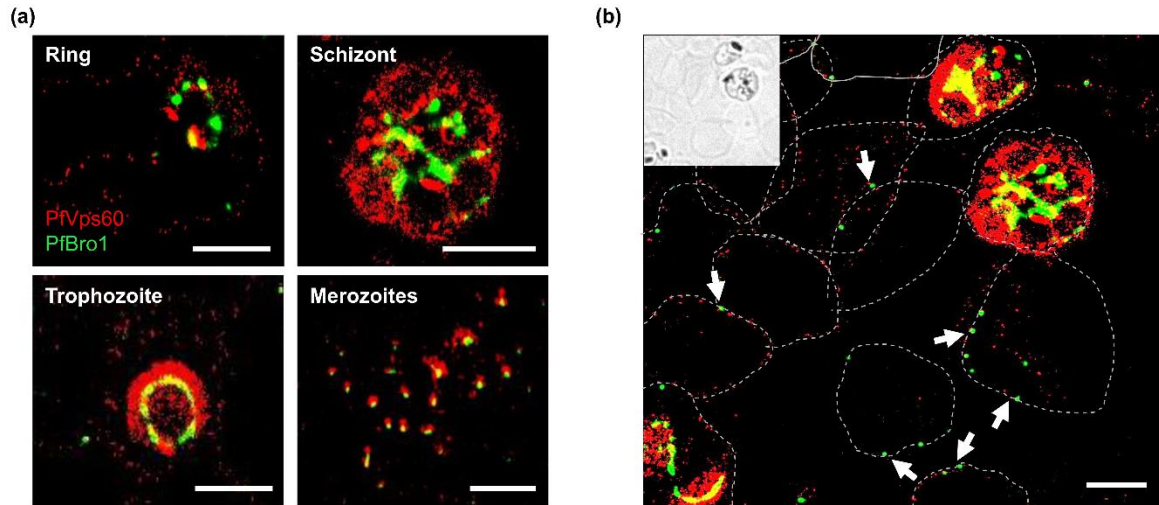

259

260 **Fig 5. STORM imaging of PfVps60 and PfBro1 colocalization. (a)** Detection of  
261 PfVps60 and PfBro1 in the blood stages of *P. falciparum*. **(b)** Field showing non-  
262 infected and infected RBCs. The inset shows a bright field low-resolution image to  
263 show the non-infected RBCs. Arrows pinpoint extracellular vesicles bound to non-  
264 infected RBCs, whose contours are indicated by dashed lines. Scale bars: 2  $\mu\text{m}$ .

265

266 **PfBro1 binds to membranes and recruits both PfVps32 and PfVps60 to**  
267 **trigger bud formation**

268 So far, our results strongly suggested that there is a minimal ESCRT-III machinery  
269 participating in the formation of EVs in *P. falciparum*. Due to the fast binding and  
270 action of ESCRT-III proteins, it is difficult to assess the function of these proteins in  
271 living cells. Other ESCRT-III mechanisms have been studied with the giant  
272 unilamellar vesicle (GUV) membrane model [33, 34] that allows control of the lipid

273 composition and visualization of the effects of ESCRT-III proteins on membranes  
274 by fluorescence microscopy.

275 To investigate whether *P. falciparum* ESCRT-III-related proteins were able to  
276 trigger membrane deformations, GUVs composed by palmitoyl-oleoyl-  
277 phosphatidylcholine (POPC) and palmitoyl-oleoyl-phosphatidylserine (POPS)  
278 (80:20) were generated to mimic the composition of the inner leaflet from the RBC  
279 plasma membrane [35]. We also included the fluorophore 1, 1'-dioctadecyl-3, 3, 3',  
280 3'-tetramethylindocarbocyanine perchlorate (Dil<sub>C18</sub>) to visualize membrane  
281 alterations (see Materials and Methods).

282 First, we tested the ability of PfBro1 to insert into lipid bilayers using its predicted  
283 hydrophobic sequence. When 600 nM of recombinant PfBro1 labeled with Oregon  
284 Green<sup>TM</sup> (OG) 488 (PfBro1-OG488) were incubated with POPC:POPS (80:20)  
285 GUVs diluted in an appropriate buffer, the protein inserted into GUVs membranes  
286 with a homogenous distribution (Fig 6a). Interestingly, some GUVs with  
287 intraluminal buds were occasionally observed at this stage (data not shown). A  
288 truncated PfBro1 version lacking its hydrophobic domain (PfBro1t) failed to insert  
289 into GUVs membranes (S5 Fig). Incubation in 150 mM NaCl, 25 mM tris-HCl, pH  
290 7.4 (protein buffer) did not affect the GUV morphology (Fig 6a, top panel). After  
291 confirming PfBro1 binding to lipid bilayers, we investigated its role as a potential  
292 recruiter and activator of ESCRT-III proteins, in particular of Snf7-containing  
293 proteins. When POPC:POPS (80:20) GUVs were incubated with 600 nM of  
294 unlabeled PfBro1, followed by the addition of 1200 nM of either PfVps32 or  
295 PfVps60 labeled with Oregon green 488 (PfVps-OG488) the combination of both

296 proteins induced the formation of intraluminal buds in the GUVs model (Fig 6b-d).  
 297 The newly formed buds following incubation with PfVps32 were significantly larger  
 298 ( $1.95 \pm 0.51 \mu\text{m}$ ) than those formed after PfVps60 addition ( $1.37 \pm 0.67 \mu\text{m}$ ) (Fig 6d).  
 299 Overall, these buds were smaller and more homogeneous in comparison to those  
 300 where only PfBro1 was used (Fig 6d). Importantly, the buds formed by PfVps60  
 301 had a necklace-like arrangement and in the infra-optic range, some tubular  
 302 structures could be observed (see S1 Video). As the incubation of PfVps32,  
 303 PfVps60 or PfVps-OG488 alone with GUVs did not produce any detectable  
 304 membrane changes (Fig 6b, c), we concluded that PfBro1 binds and activates both  
 305 proteins.

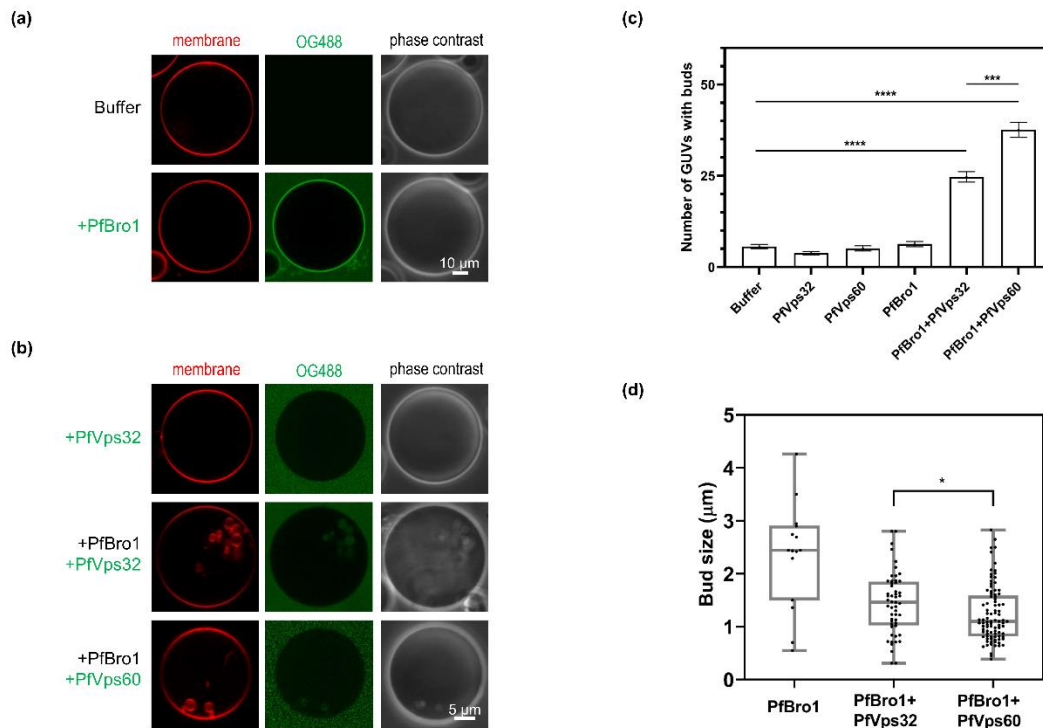

306 **Fig 6. Intraluminal bud formation triggered by ESCRT-III *Plasmodium***  
 307 **proteins.** GUVs composed by POPC:POPS (80:20), labeled with Dil<sub>C18</sub> and diluted  
 308 1:2 in protein buffer were incubated with **(a)** 600 nM PfBro1-OG488 with a 1:3 ratio  
 309 of labeled and unlabeled protein, or **(b)** 600 nM PfBro1 and 1200 nM of either



310 PfVps32 or PfVps60 labeled with OG488 (1:3, labeled: unlabeled) and visualized  
311 by fluorescence confocal microscopy. **(c)** Quantification of the number of GUVs  
312 with internal buds formed after protein addition. **(d)** Size of buds formed after the  
313 addition of the proteins indicated below the graph. Bars represent the mean and  
314 standard error of three independent experiments where 50 GUVs were observed.  $p$   
315 values were determined by Student's t-test. (\*)  $p < 0.05$ , (\*\*\*)  $p < 0.001$ , (\*\*)  $p < 0.01$ ,  $p <$   
316  $0.001$ , and (\*\*\*\*)  $p < 0.001$

317

### 318 **Putative activation of PfVps60 by PfBro1**

319 It is well known that the activation of ESCRT-III subunits occurs after the  
320 displacement of the C-terminal domain that is blocking the binding site in the  
321 inhibited form of the protein [36]. The rearrangement of this domain has been  
322 documented to occur upon binding of activation factors such as Vps20, Vps32 or  
323 Bro1 [37]. To check whether this mechanism could be also operating in *P.*  
324 *falciparum*, we performed an *in silico* docking assay using the predicted tertiary  
325 structure of the Bro1 domain from PfBro1 and the full-length PfVps60 protein. This  
326 pair of proteins was selected because a higher number of GUVs with intraluminal  
327 buds was observed for this combination (Fig 6c). Upon binding to the PfBro1  
328 domain, it was predicted that PfVps60 changed from a “closed” to an “open”  
329 conformation where the C-terminal domain modified its angle and allowed the  
330 exposure of the binding site (S6 Fig). The conformational change predicted by this  
331 model is consistent with the GUV protein reconstitution assays presented above.

332 **PfBro1 and PfVps32 trigger bud formation by direct shedding from the**  
333 **plasma membrane**

334 Although by using the purified recombinant proteins from *P. falciparum* and the  
335 GUV model we were able to reconstitute one of the two EV biogenesis pathways  
336 described in higher eukaryotic cells (MVB biogenesis; see review in [38]), the  
337 mechanism of microvesicles formation by direct shedding from the plasma  
338 membrane displays a different topology. To mimic the correct topology involved in  
339 this mechanism of EV biogenesis, a microinjection approach was used, where the  
340 biotinylated lipid 1,2-distearoyl-sn-glycero-3-phosphoethanolamine-N-  
341 [biotinyl(polyethylene glycol)-2000] (DSPE-PEG-biotin) was included in the lipid  
342 mixture to form, by a gel assisted method, GUVs containing protein buffer in their  
343 lumen. GUVs were harvested and immobilized on an avidin-coated surface to allow  
344 their manipulation for injection. It is important to mention that previously to the  
345 injection, a z-stack acquisition was performed in the confocal microscope to verify  
346 that GUVs lacked alterations in the membrane and that the contact area with the  
347 coverslip was not excessively large, which could compromise the assay (see  
348 example of selected GUVs in S7 Fig). As protein labeling can compromise protein  
349 activity, we used free PEG-fluorescein isothiocyanate (FITC) dye (0.03 mg/ml in  
350 protein buffer) to visualize the injection process. The incorporation of this control  
351 dye did not produce any detectable alterations in GUVs (see S8 Fig and S2 Video).  
352 Upon injection of either PfBro1 or PfVps32 no significant changes were observed  
353 in the membrane of the injected GUVs (data not shown), whereas, when a mixture  
354 of PfBro1, PfVps32 and PEG-FITC was injected, the formation of extracellular buds

355 was visualized (Fig 7 and S3 Video). Interestingly, the newly formed vesicles  
356 remained attached to the mother vesicle moving along its surface (S3 Video).  
357 Contrary to the experiments observed in the previous approach (Fig 6), these new  
358 buds appeared as single bodies with a homogeneous average size of  $0.88 \pm .076$   
359  $\mu\text{m}$ .

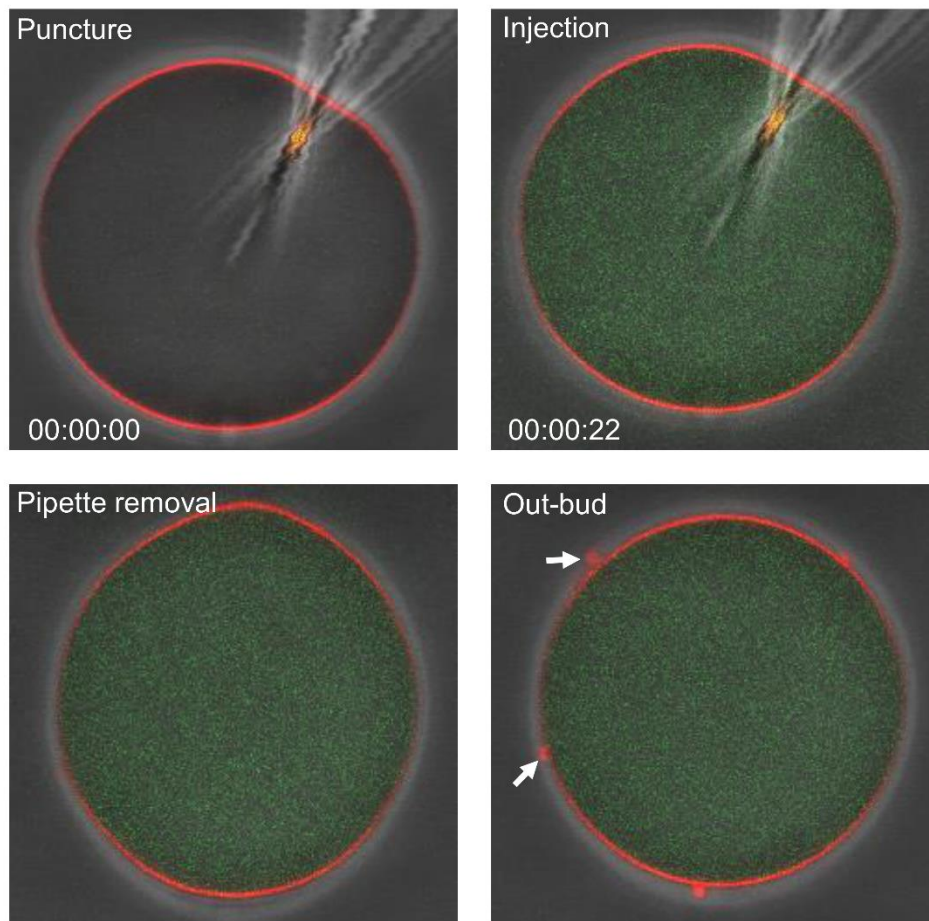

360

361 **Fig 7. Injection of ESCRT-III *Plasmodium* proteins in GUVs and outward**  
362 **budding.** Panels show injection of a mixture of PfBro1 and PfVps32 (1:2) together  
363 with PEG-FITC in GUVs composed by POPC:POPS:DSPE-biotin (79:20:1) and

364 labeled with Dil<sub>C18</sub> (0.1 mol%). Four main events are presented: puncture, injection,  
365 pipette removal and generation of outward buds (arrows).

366

### 367 **Disruption of PfVps60 causes a defect in EV production in *P. falciparum***

368 Next, we evaluated the effect of ESCRT-III machinery inactivation on EV  
369 production by *P. falciparum*. While we failed at obtaining a stable strain for the KO  
370 of PfVps32 and PfBro1 (probably due to their essential role in the life cycle of the  
371 parasite), we succeeded in the establishment of a PfVps60 KO strain by  
372 CRISPR/Cas9 gene edition (Fig 8a). Gene silencing and DNA integration were  
373 confirmed by diagnostic PCR as shown in Fig 8b. The relative fitness of the  
374 generated KO line was evaluated by a growth curve, which showed a slower  
375 progression in the KO line compared to its parental line (intraerythrocytic  
376 developmental cycle of 52.38 vs. 55.41 h, respectively) (Fig 8c). The suppression  
377 of PfVps60 was confirmed by immunofluorescence assays, which indicated the  
378 absence of the protein (Fig 8d). In order to study the effects of the PfVps60 KO on  
379 the EVs production, we proceed to purify EVs in synchronized cultures after 40 hpi.  
380 The number of EVs was significantly reduced in the KO parasites in comparison to  
381 the parental line 3D7 (Fig 8e). Accordingly, the total amount of protein exported in  
382 the EVs from the KO parasites was also reduced (Fig 8f).

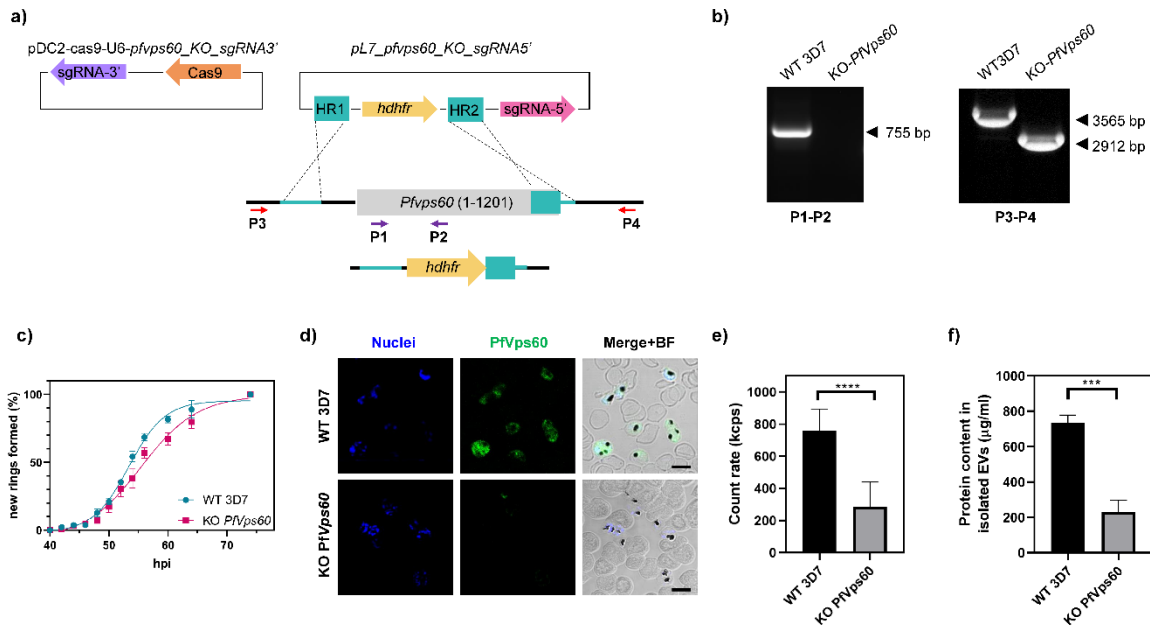

383

384 **Fig. 8. Generation and validation of *PfVps60* KO parasites.** (a) Schematic of  
 385 the strategy to generate the transgenic lines using the CRISPR/Cas9 system.  
 386 Arrows indicate the position of primers used for diagnostic PCR. (b) Diagnostic  
 387 PCR confirmation of the integration of the pL7-*Pfvps60\_KO\_sgRNA3'* plasmid at  
 388 the *Pfvps60* locus. Legend at the bottom indicate the primer pair used for each  
 389 PCR reaction. Genomic DNA from the WT 3D7 line or the *Pfvps60* KO transgenic  
 390 line was used. The size of the bands as expected are indicated in the left side. (c)  
 391 Asexual blood cycle duration in the *Pfvps60* KO line compared with its parental  
 392 3D7 line. Percentages indicate the proportion of rings observed relative to the total  
 393 number of rings at the end of the assay. Data was fitted to a sigmoidal curve with  
 394 variable slope to extract the intraerythrocytic developmental cycle (IDC). (d)  
 395 Human erythrocytes infected with *P. falciparum* were fixed and PfVps60 was  
 396 detected by indirect immunofluorescence microscopy. Cell nuclei were visualized  
 397 with Hoechst 33342 (blue). Fields were merged with bright field (BF) to assess

398 localization. Scale bar: 5  $\mu\text{m}$ . **(e)** Count rate of purified EVs expressed in kilo  
399 counts per second (kcps). **(f)** Protein content in purified EVs. Each symbol shows  
400 the mean of three different replicates, bars show the SE.

401

## 402 **Discussion**

403 *Plasmodium*-infected erythrocytes increase the release of EVs, which participate in  
404 different pathogenic mechanisms (see review in [39]), including cytoadherence  
405 during cerebral malaria [40, 41], cell-cell communication between parasites [42,  
406 43], gametocytogenesis induction [42, 43], DNA transport [44] and transfer of drug  
407 resistance genes [43]. In higher eukaryotes, the ESCRT-III machinery is involved  
408 in both types of EV generation: exosome release and microvesicle budding [45,  
409 46]. However, the mechanisms underlying the release of EVs in *Plasmodium*-  
410 infected cells are far from being understood. The *P. falciparum* genome lacks  
411 genes encoding for ESCRT-III activating factors, such as Vps20 and ESCRT-II  
412 members [28] (S1 Table). Therefore, we hypothesize that there are alternative  
413 pathways for ESCRT-III activation in *P. falciparum* and most likely in other  
414 intracellular protists such as *Toxoplasma gondii* and *Cryptosporidium parvum*, which  
415 also lack the aforementioned genes [23]. In *S. cerevisiae* and humans, Bro1  
416 homologues are able to bind directly to the Snf7 domain of Vps32 and CHMP5  
417 (Vps60 homologue) and activate ESCRT-III polymerization on the membranes [24,  
418 30, 47]. In the present study, we show that *P. falciparum* possesses a Bro1  
419 domain-containing protein, PfBro1, capable of activating two SNF7-containing  
420 proteins, PfVps32 and PfVps60, with redundant functions. These proteins are

421 expressed throughout the intraerythrocytic cycle. Whereas PfVps60 and PfBro1  
422 exhibited a maximum expression level at 32 hpi, corresponding to the trophozoite  
423 stage, PfVps32 had the highest expression in the early stages (8 to 24 hpi). The  
424 different expression patterns of these proteins as well as their localization in  
425 different subcellular fractions suggest that they display a site- and time-specific  
426 action, despite fulfilling similar functions as discussed below.

427 STORM imaging allowed us to observe the colocalization of PfVps60 and PfBro1  
428 at the asexual blood stages of *P. falciparum* parasites, which suggests their  
429 possible association in the parasite. Furthermore, these proteins were detected in  
430 EVs at the surface of non-infected erythrocytes, thus suggesting their involvement  
431 in a potential pathogenic mechanism that could facilitate invasion of targeted cells.  
432 However, further experiments are required to define the role of these EVs in non-  
433 infected RBCs.

434 The identified PfBro1 has a hydrophobic sequence in its C-terminal region that  
435 likely allows its insertion into GUVs lipid bilayers, thus making it a good candidate  
436 for ESCRT-III recruitment at the membrane. The study of ESCRT-III interactions in  
437 living cells is problematic as the association between the different molecular  
438 components occurs in a fast manner and the complexes are difficult to obtain.  
439 Therefore, *in silico* docking assays were performed and the results showed that  
440 PfVps60 can shift from a closed (inactive) to an open (active) conformation upon  
441 PfBro1 interaction. Furthermore, we proved that PfBro1 is able to recruit both  
442 PfVps32 and PfVps60 to the GUV membrane and activate them, leading to the  
443 formation of buds even in the absence of energy, as occurs in the same model with

444 other ESCRT-III homologues [48]. Moreover, the purified proteins were used to  
445 recreate the two topologies of EV production (MVB generation and membrane  
446 shedding) in GUVs that mimic the composition of the inner leaflet of the  
447 erythrocyte's plasma membrane. As the newly formed buds remained in close  
448 contact with the mother vesicle, we hypothesize that more factors are needed to  
449 release the nascent vesicle from the membrane. Interestingly, while bud generation  
450 is triggered by both PfVps32 and PfVps60 in a similar manner, the nascent  
451 vesicles vary in size showing differences depending on the protein added and the  
452 employed approach. For instance, PfVps32 lead to significantly bigger buds in  
453 comparison to PfVps60 when the proteins are added to the GUV-batch solution. In  
454 higher eukaryotes there are several factors governing the size of ESCRT-III-  
455 derived buds, including Vps4 disassembly action [49, 50], size of cargo [33] and  
456 membrane tension [48]. In the case of *P. falciparum*, whether the size of EVs is  
457 regulated by other ESCRT proteins encoded in its genome or by membrane  
458 biophysical properties, remains to be explored in the future.

459 The detection of PfBro1, PfVps32 and PfVps60 in purified EVs from a pRBC  
460 culture demonstrates that the observed EVs are of parasite origin and generated  
461 by ESCRT-III action. Previous studies found that the isolation method could affect  
462 the protein content of *Plasmodium*-derived EVs [42, 43, 51]. In agreement with this  
463 observation, our STORM analysis revealed a wide heterogeneity of vesicles, with  
464 different apparent size and protein distribution. Importantly, the RBC membrane  
465 protein, GPA, was mainly detected in PfVps32-positive EVs, which most probably  
466 correspond to EVs derived from the RBC plasma membrane (microvesicles). On



467 the contrary, GPA was much less abundant in PfVps60-positive and PfBro1-  
468 enriched EVs, suggesting that their source does not involve the plasma RBC  
469 membrane and they are exclusively of parasite origin, probably generated through  
470 MVBs formation. These results strongly suggest that both types of EV formation  
471 are being carried out in *Plasmodium*-infected RBCs, thus supporting previous  
472 observations [42, 43]. Interestingly, GPA has also been detected in *P. falciparum*  
473 L-lactate dehydrogenase-carrying EVs which are involved in the control of the  
474 parasite's proliferation *in vitro* [52]. Whether PfVps32 is also involved in the  
475 transport of this protein or others remains to be elucidated. Furthermore, silencing  
476 of the *Pfvps60* gene resulted in the reduction of the number of EVs produced  
477 during the first 40 hpi, which confirms its participation in EVs biogenesis during  
478 *Plasmodium* infection. Although our initial aim was to inactivate the whole ESCRT-  
479 III complex, we could not obtain stable KO lines for PfVps32 and PfBro1 proteins,  
480 probably due to their involvement in essential processes from the parasite, most  
481 likely in cytokinesis as occurs in other eukaryotes [49, 53].

482 Altogether, our results improve the mechanistic understanding of protein export in  
483 *P. falciparum*. Research in this field has mainly focused on the soluble proteins  
484 secreted by the parasites, but the mechanism underlying the export of other  
485 molecules is still not well understood. Here we describe for the first time a  
486 functional ESCRT-III machinery in *P. falciparum* that is involved in the production  
487 of EVs in infected erythrocytes, where two redundant proteins, PfVps32 and  
488 PfVps60 appear to be time- and site-specific. Due to the low amino acid  
489 conservation with their human homologues, as well as their presence throughout

490 the whole intraerythrocytic cycle, the proteins studied here represent a potential  
491 target for new therapeutic strategies to control malaria.

## 492 **Materials and Methods**

### 493 ***P. falciparum* culture and synchronization**

494 Unless otherwise indicated, reagents were purchased from Sigma-Aldrich (St.  
495 Louis, MO, USA). Asexual stages of *P. falciparum* 3D7 were propagated in group B  
496 human erythrocytes at 3% hematocrit using RPMI medium supplemented with  
497 0.5% (w/v) Albumax II (Life Technology, Auckland, New Zealand) and 2 mM L-  
498 glutamine. Parasites were maintained at 37 °C under an atmosphere of 5% O<sub>2</sub>, 5%  
499 CO<sub>2</sub> and 90% N<sub>2</sub>. For all experiments, the parasitemia of the culture was  
500 maintained between 3 and 5%.

501 For tight synchronization, the parasite culture was initially synchronized in the ring  
502 stage with a 5% sorbitol lysis [54] followed by a second 5% sorbitol lysis after 36 h.  
503 Then, 36 h after the second sorbitol, parasites were synchronized in the schizont  
504 stages by treatment in 70% Percoll (GE Healthcare, Uppsala, Sweden) density  
505 centrifugation at 1,070 × g for 10 min. Finally, after the third synchronization a final  
506 5% sorbitol lysis was done, yielding parasites tightly synchronized at 8 hpi.

507 *P. falciparum* NF54-*gexp02-tdTomato* gametocytes were induced by choline  
508 removal[55] and selected by addition of 50 mM N-acetyl-D-glucosamine[56].

## 509 **STORM**

510 A 5% parasitemia RBC culture was prepared for super-resolution microscopy as  
511 described in[57]. Briefly, a  $\mu$ -Slide 8 well chamber slide (ibidi) was coated for 20  
512 min at 37°C with 50 mg/ml concanavalin A. Then, wells were rinsed with pre-  
513 warmed phosphate buffered saline (PBS) before parasite seeding. Infected RBCs  
514 were washed twice with PBS and deposited into the wells. Cells were incubated for  
515 10 min at 37 °C and unbound RBCs were washed away with three PBS rinses.  
516 Seeded RBCs were fixed with pre-warmed 4% paraformaldehyde at 37 °C for 20  
517 min. After this time, cells were washed with PBS and then, incubated with  
518 antibodies  $\alpha$ -PfVps32-Alexa Fluor 488,  $\alpha$ -PfVps60-Alexa Fluor 488 (1:500) and  $\alpha$ -  
519 PfBro1-Alexa Fluor 647 (1:1000). Finally, nuclei were counterstained with Hoechst  
520 33342 (2  $\mu$ g/ml).

521 Before STORM acquisition, the buffer was exchanged to OxEA buffer (3% V/V  
522 oxyrase, 100  $\mu$ M DL-lactate, 100 mM  $\beta$ -mercaptoethylamine, dissolved in 1 $\times$  PBS,  
523 pH 8.4) [58]. STORM images were acquired using a Nikon N-STORM system  
524 configured for total internal reflection fluorescence imaging. Excitation inclination  
525 was tuned to adjust focus and to maximize the signal-to-noise ratio. Alexa Fluor  
526 647 and 488 were excited, respectively, illuminating the sample with 647 nm and  
527 488 nm laser lines built into the microscope. Fluorescence was collected by means  
528 of a Nikon 100 $\times$ , 1.4 NA oil immersion objective and passed through a quad-band-  
529 pass dichroic filter (97335 Nikon). 20,000 frames at 50 Hz were acquired for each  
530 channel. Images were recorded onto a 256 $\times$ 256 pixel region (pixel size 160 nm) of  
531 a CMOS camera. STORM images were analyzed with the STORM module of the  
532 NIS element Nikon software.

### 533 **Reconstitution of ESCRT-III in GUVs**

534 GUVs containing POPC, POPS, and the fluorophore Dil<sub>C18</sub> (Invitrogen, CA, USA)  
535 (80:20:0.1) were prepared in 600 mM sucrose as described previously [34]. Briefly,  
536 the lipid mix was spread on tin oxide-coated glass slides, and electro-swelling was  
537 performed for 1 h at room temperature (RT) at 1.2 V, and 10 Hz. All lipids were  
538 obtained from Avanti Polar Lipids (Alabaster, IL, USA).

539 For PfBro1 binding assays, GUVs were harvested and diluted 1:1 with 2 folds'  
540 protein buffer (50 mM tris-HCl, 300 mM NaCl, pH 7.4). After 10 min of equilibration,  
541 GUVs were incubated with 600 nM of either OG488-PfBro1 or OG488-PfBro1t. For  
542 PfVps32 recruitment, equilibrated GUVs were incubated with 600 nM of PfBro1  
543 and 1200 nM of either PfVps32 or PfVps60 with at least 10 min of incubation at RT  
544 between the additions of each protein. Images were acquired with a Leica TCS  
545 SP5 confocal microscope (Mannheim, Germany). Dil<sub>C18</sub> was excited with a 561 nm  
546 laser and OG488 with a 488 nm line of an Argon laser. To avoid crosstalk between  
547 the different fluorescence signals, a sequential scanning was performed. All  
548 experiments shown in the same figure were done with the same GUV batch for  
549 comparability. Each experiment was repeated on at least three separate occasions  
550 with different batches of GUVs.

### 551 **Femtoliter injection**

552 A lipid mixture of POPC, POPS, DSPE-PEG-biotin, and DPPE-rhodamine  
553 (78.9:20:1:0.1 mol%) was prepared in chloroform. GUVs filled with protein buffer  
554 were grown by the gel-assisted method. Briefly, a 5% (w/w) polyvinyl alcohol (PVA)

555 solution was prepared in protein buffer (25 mM tris-HCl, pH 7.4, 150 mM NaCl).  
556 The PVA solution was spread on a microscope coverslip and then dried for at least  
557 30 min at 50 °C. 10-15 µl of lipids dissolved in chloroform (1 mg/ml) were spread  
558 on the dried PVA film and placed under vacuum for 1 h to eliminate the solvent. A  
559 chamber was formed with a homemade Teflon® spacer sandwiched between two  
560 glasses and filled with protein buffer for 10 min at RT. Then, GUVs were harvested  
561 by gentle tapping on the bottom of the chamber and collected using a micropipette  
562 without touching the PVA film to avoid sample contamination. To immobilize GUVs,  
563 cleaned coverslips were incubated for 20 min at RT with a 1:1 mixture of 1 mg/ml  
564 BSA-biotin, 1 mg/ml BSA (both diluted in protein buffer to maintain osmolarity).  
565 After incubation, coverslips were washed with distilled water and incubated with  
566 0.005 mg/ml avidin. Subsequently, slides were washed and dried with N<sub>2</sub>. These  
567 coverslips were used to assemble a homemade observation chamber using a  
568 Teflon® spacer, GUVs were deposited and let to settle down for at least 10 min.  
569 The micropipettes used to perform the injection were fabricated from thin wall  
570 borosilicate capillaries glass with filament (Harvard Apparatus, Holliston, MA, USA)  
571 in a pipette puller (Sutter Instruments, Novato, CA, USA) to obtain bee-needle type  
572 tips. For the injection experiments, immobilized GUVs were imaged under a Leica  
573 TCS SP5 confocal microscope. The micropipette was placed on a mechanical  
574 holder attached to a micromanipulator (Sutter Instruments) and then connected to  
575 a Femtojet microinjector set (Eppendorf). Injection was performed in a 15° angle,  
576 using a pressure of injection of 150 hPa, time of injection of 5.0 s and a  
577 compensation pressure of 1 hPa. The solution injected corresponded to a 4x

578 protein mixture stock (2.4 nM PfBro1 and 4.8 nM of either PfVps32 or PfVps60  
579 dissolved in 1× buffer) and 0.03 mg/ml PEG-FITC to monitor injection.

### 580 **Generation of *Pfvps60* KO strain**

581 Homology regions (HR) of the 5'UTR (HR1, spanning positions -762 to -243 from  
582 the *Pfvps60* start codon) and 3'UTR (HR2, spanning positions 1,012 to 1,553 from  
583 the *Pfvps60* start codon) were PCR amplified using genomic DNA purified from a  
584 *P. falciparum* 3D7 culture synchronized at late stages. Primers used for PCR  
585 amplification are listed in table S2. The generated HR1 and HR2 were cloned by  
586 ligation using restriction sites *SpeI* and *AflIII* (HR1), and *EcoRI* and *NcoI* (HR2) into  
587 a modified pL6-*egfp* donor plasmid [59] in which the *yfcu* cassette had been  
588 removed [60]. The single guide RNA (sgRNA) specific for the *Pfvps60* gene and  
589 targeting the sequence near the 5' end (sgRNA 5', position -225, -206) was  
590 generated by cloning annealed oligonucleotides into the *BtgZI* site to generate the  
591 pL7-*pfvps60\_KO\_sgRNA5'* plasmid. On the other hand, the pDC2-Cas9-U6-*hdhfr*  
592 vector [61] was modified by cloning a sgRNA specific for the sequence near the 3'  
593 end (sgRNA 3', position 980, 999) into the *BtgZI* site of this plasmid to generate the  
594 pDC2-Cas9-U6-*pfvps60\_KO\_sgRNA3'* plasmid. All guides were cloned using the  
595 In-Fusion system (Clontech, Japan).

596 For transfection of 3D7 rings, 60 µg of circular pDC2-Cas9-U6-*hdhfr*-  
597 *pfvps60\_KO\_sgRNA3'* plasmid and 30 µg of linearized (with *PvuI*) donor plasmid  
598 were precipitated, washed and resuspended in 30 µl of sterile 10 mM Tris, 1 mM  
599 EDTA (TE) buffer. Then, plasmids were diluted in 370 µl of Cytomix buffer (120  
600 mM KCl, 0.15 mM CaCl<sub>2</sub>, 10mM K<sub>2</sub>HPO<sub>4</sub>/KH<sub>2</sub>PO<sub>4</sub>, 25 mM HEPES, 2 mM EGTA, 5

601 mM MgCl<sub>2</sub>, pH 7.6) and introduced into parasites by electroporation using a Bio-  
602 Rad Gene Pulser Xcell™ system, at 310 V, 950 μF of capacitance and without  
603 resistance. Electroporated parasites were carefully recovered and resuspended in  
604 RPMI medium supplemented with 0.5% (w/v) Albumax II and 2 mM L-glutamine.  
605 Twenty-four hours after transfection, cultures were selected with 10 nM WR99210  
606 for 4 consecutive days [62]. To validate the integration of the plasmids, a  
607 diagnostic PCR analysis was performed using LA Taq® DNA polymerase (Takara,  
608 Japan), the primers listed in table S2 and gDNA obtained from the *Pfvps60* KO  
609 strain and compared with the WT 3D7 strain. The fitness of the generated line  
610 compared with the parental 3D7 line, was evaluated by calculating the percentage  
611 of newly formed rings in tightly synchronized cultures. Initial parasitemia was  
612 determined at ~18 hpi, then rings parasitemia was determined at different time  
613 points within the period were most schizont bursting and reinvasion events  
614 occurred (44 to 62 hpi). The final point was 74 hpi when all viable schizonts had  
615 burst [60]. Data points were determined by the proportion of rings relative to the  
616 total number of rings at the end of the assay. Data was fitted to a sigmoidal dose-  
617 response curve and the time to generate 50% or the rings in each population was  
618 determined [63].

## 619 **Funding**

620 This research was funded by the Ministerio de Ciencia, Innovación y  
621 Universidades, Spain (which included FEDER funds), grant numbers BIO2014-  
622 52872-R and RTI2018-094579-B-I00. ISGlobal and IBEC are members of the  
623 CERCA Programme, Generalitat de Catalunya. Y. A. P. and L.N.B.-C. thank the

624 financial support provided by the European Commission under Horizon 2020's  
625 Marie Skłodowska-Curie Actions COFUND scheme (712754) and by the Severo  
626 Ochoa programme of the Spanish Ministry of Science and Competitiveness [SEV-  
627 2014-0425 (2015-2019)]. This work is part of the MaxSynBio consortium, which was  
628 jointly funded by the Federal Ministry of Education and Research of Germany and  
629 the Max Planck Society. This research is part of ISGlobal's Program on the  
630 Molecular Mechanisms of Malaria which is partially supported by the *Fundación*  
631 *Ramón Areces*.

632

## 633 **Acknowledgments**

634 We thank Harvie Portugaliza and Alfred Cortés for the *P. falciparum* NF54 gexp02-  
635 tdTomato transgenic line. We are also grateful to Dr. Elisabet Tintó-Font for  
636 donating the plasmids that were used for our CRISPR/Cas9 constructs. Authors  
637 acknowledge Dr. Igor Florez-Sarasa for critical reading of this manuscript.

## 638 **References**

- 639 1.WHO. World Malaria Report 2019 Geneva: World Health Organization; 2019. 232 pp]. Available  
640 from: <https://www.who.int/malaria/publications/world-malaria-report-2019/en/>.
- 641 2.Couper KN, Barnes T, Hafalla JCR, Combes V, Ryffel B, Secher T, et al. Parasite-Derived Plasma  
642 Microparticles Contribute Significantly to Malaria Infection-Induced Inflammation through Potent  
643 Macrophage Stimulation. Plos Pathogens. 2010;6(1). doi: ARTN  
644 e100074410.1371/journal.ppat.1000744. PubMed PMID: WOS:000274227100034.
- 645 3.Combes V, Taylor TE, Juhan-Vague I, Mege JL, Mwenechanya J, Tembo M, et al. Circulating  
646 endothelial microparticles in Malawian children with severe falciparum malaria complicated with  
647 coma. Jama-Journal of the American Medical Association. 2004;291(21):2542-4. doi: DOI  
648 10.1001/jama.291.21.2542-b. PubMed PMID: WOS:000221738800014.
- 649 4.Mfonkeu JBP, Gouado I, Kuate HF, Zambou O, Zollo PHA, Grau GER, et al. Elevated Cell-Specific  
650 Microparticles Are a Biological Marker for Cerebral Dysfunctions in Human Severe Malaria. Plos



- 651 One. 2010;5(10). doi: ARTN e1341510.1371/journal.pone.0013415. PubMed PMID:  
652 WOS:000282941000026.
- 653 5.Campos FMF, Franklin BS, Teixeira-Carvalho A, Filho ALS, de Paula SCO, Fontes CJ, et al.  
654 Augmented plasma microparticles during acute Plasmodium vivax infection. Malaria Journal.  
655 2010;9. doi: ArtN 32710.1186/1475-2875-9-327. PubMed PMID: WOS:000287600800002.
- 656 6.Lauer SA, Rathod PK, Ghori N, Haldar K. A membrane network for nutrient import in red cells  
657 infected with the malaria parasite. Science. 1997;276(5315):1122-5. doi: DOI  
658 10.1126/science.276.5315.1122. PubMed PMID: WOS:A1997WZ22500047.
- 659 7.Akers JC, Gonda D, Kim R, Carter BS, Chen CC. Biogenesis of extracellular vesicles (EV): exosomes,  
660 microvesicles, retrovirus-like vesicles, and apoptotic bodies. Journal of Neuro-Oncology.  
661 2013;113(1):1-11. doi: 10.1007/s11060-013-1084-8. PubMed PMID: WOS:000318300700001.
- 662 8.Schlacht A, Herman EK, Klute MJ, Field MC, Dacks JB. Missing Pieces of an Ancient Puzzle:  
663 Evolution of the Eukaryotic Membrane-Trafficking System. Cold Spring Harbor Perspectives in  
664 Biology. 2014;6(10). doi: ARTN a01604810.1101/cshperspect.a016048. PubMed PMID:  
665 WOS:000346448700007.
- 666 9.Van Niel G, D'Angelo G, Raposo G. Shedding light on the cell biology of extracellular vesicles. Nat  
667 Rev Mol Cell Bio. 2018;19(4):213-28. doi: 10.1038/nrm.2017.125. PubMed PMID:  
668 WOS:000427924900008.
- 669 10.Raposo G, Stoorvogel W. Extracellular vesicles: exosomes, microvesicles, and friends. J Cell Biol.  
670 2013;200(4):373-83. doi: 10.1083/jcb.201211138. PubMed PMID: 23420871; PubMed Central  
671 PMCID: PMC3575529.
- 672 11.Winter V, Hauser MT. Exploring the ESCRTing machinery in eukaryotes. Trends Plant Sci.  
673 2006;11(3):115-23. Epub 2006/02/21. doi: S1360-1385(06)00034-3  
674 [pii]10.1016/j.tplants.2006.01.008. PubMed PMID: 16488176; PubMed Central PMCID:  
675 PMC2865992.
- 676 12.Katzmann DJ, Odorizzi G, Emr SD. Receptor downregulation and multivesicular-body sorting.  
677 Nat Rev Mol Cell Biol. 2002;3(12):893-905. Epub 2002/12/04. doi: 10.1038/nrm973nrm973 [pii].  
678 PubMed PMID: 12461556.
- 679 13.Raiborg C, Stenmark H. The ESCRT machinery in endosomal sorting of ubiquitylated membrane  
680 proteins. Nature. 2009;458(7237):445-52. doi: 10.1038/nature07961. PubMed PMID:  
681 WOS:000264532400033.
- 682 14.Katzmann DJ, Stefan CJ, Babst M, Emr SD. Vps27 recruits ESCRT machinery to endosomes  
683 during MVB sorting. Journal of Cell Biology. 2003;162(3):413-23. doi: 10.1083/jcb.200302136.  
684 PubMed PMID: WOS:000184667900007.
- 685 15.Gill DJ, Teo H, Sun J, Perisic O, Veprintsev DB, Emr SD, et al. Structural insight into the ESCRT-I/-  
686 II link and its role in MVB trafficking. Embo Journal. 2007;26(2):600-12. doi:  
687 10.1038/sj.emboj.7601501. PubMed PMID: WOS:000243730700030.
- 688 16.Im YJ, Wollert T, Boura E, Hurley JH. Structure and Function of the ESCRT-II-III Interface in  
689 Multivesicular Body Biogenesis. Developmental Cell. 2009;17(2):234-43. doi:  
690 10.1016/j.devcel.2009.07.008. PubMed PMID: WOS:000269138600013.

- 691 17. Boura E, Rozycki B, Chung HS, Herrick DZ, Canagarajah B, Cafiso DS, et al. Solution Structure of  
692 the ESCRT-I and -II Supercomplex: Implications for Membrane Budding and Scission. *Structure*.  
693 2012;20(5):874-86. doi: 10.1016/j.str.2012.03.008. PubMed PMID: WOS:000304214400013.
- 694 18. Babst M, Katzmann DJ, Snyder WB, Wendland B, Emr SD. Endosome-associated complex,  
695 ESCRT-II, recruits transport machinery for protein sorting at the multivesicular body.  
696 *Developmental Cell*. 2002;3(2):283-9. doi: Doi 10.1016/S1534-5807(02)00219-8. PubMed PMID:  
697 WOS:000177325700017.
- 698 19. Teis D, Saksena S, Judson BL, Emr SD. ESCRT-II coordinates the assembly of ESCRT-III filaments  
699 for cargo sorting and multivesicular body vesicle formation. *Embo Journal*. 2010;29(5):871-83. doi:  
700 10.1038/emboj.2009.408. PubMed PMID: WOS:000275169800002.
- 701 20. Obita T, Saksena S, Ghazi-Tabatabai S, Gill DJ, Perisic O, Emr SD, et al. Structural basis for  
702 selective recognition of ESCRT-III by the AAA ATPase Vps4. *Nature*. 2007;449(7163):735-U11. doi:  
703 10.1038/nature06171. PubMed PMID: WOS:000250045000047.
- 704 21. Hurley JH. ESCRTs are everywhere. *Embo J*. 2015;34(19):2398-407. doi:  
705 10.15252/embj.201592484. PubMed PMID: WOS:000362457800006.
- 706 22. Henne WM, Stenmark H, Emr SD. Molecular mechanisms of the membrane sculpting ESCRT  
707 pathway. *Cold Spring Harb Perspect Biol*. 2013;5(9). Epub 2013/09/05. doi:  
708 10.1101/cshperspect.a016766a016766 [pii]5/9/a016766 [pii]. PubMed PMID: 24003212.
- 709 23. Leung KF, Dacks JB, Field MC. Evolution of the multivesicular body ESCRT machinery; retention  
710 across the eukaryotic lineage. *Traffic*. 2008;9(10):1698-716. doi: 10.1111/j.1600-  
711 0854.2008.00797.x. PubMed PMID: WOS:000259238000013.
- 712 24. Dores MR, Paing MM, Lin H, Montagne WA, Marchese A, Trejo J. AP-3 regulates PAR1 ubiquitin-  
713 independent MVB/lysosomal sorting via an ALIX-mediated pathway. *Mol Biol Cell*.  
714 2012;23(18):3612-23. Epub 2012/07/27. doi: 10.1091/mbc.E12-03-0251mbc.E12-03-0251 [pii].  
715 PubMed PMID: 22833563; PubMed Central PMCID: PMC3442409.
- 716 25. Jimenez-Ruiz E, Morlon-Guyot J, Daher W, Meissner M. Vacuolar protein sorting mechanisms in  
717 apicomplexan parasites. *Molecular and Biochemical Parasitology*. 2016;209(1-2):18-25. doi:  
718 10.1016/j.molbiopara.2016.01.007. PubMed PMID: WOS:000390632200004.
- 719 26. Yang M, Coppens I, Wormsley S, Baevova P, Hoppe HC, Joiner KA. The *Plasmodium falciparum*  
720 Vps4 homolog mediates multivesicular body formation. *Journal of Cell Science*.  
721 2004;117(17):3831-8. doi: 10.1242/jcs.01237. PubMed PMID: WOS:000223733100013.
- 722 27. Dimova R, Marques C. *The Giant Vesicle Book*: Taylor & Francis group; 2019.
- 723 28. Winter V, Hauser MT. Exploring the ESCRTing machinery in eukaryotes. *Trends in Plant Science*.  
724 2006;11(3):115-23. doi: 10.1016/j.tplants.2006.01.008. PubMed PMID: WOS:000236648200004.
- 725 29. Kim JW, Sitaraman S, Hierro A, Beach BM, Odorizzi G, Hurley JH. Structural basis for endosomal  
726 targeting by the Bro1 domain. *Developmental Cell*. 2005;8(6):937-47. doi:  
727 10.1016/j.devcel.2005.04.001. PubMed PMID: WOS:000230006200017.
- 728 30. Mu R, Dussupt V, Jiang J, Sette P, Rudd V, Chuenchor W, et al. Two distinct binding modes  
729 define the interaction of Brox with the C-terminal tails of CHMP5 and CHMP4B. *Structure*.

- 730 2012;20(5):887-98. Epub 2012/04/10. doi: 10.1016/j.str.2012.03.001. PubMed PMID: 22484091;  
731 PubMed Central PMCID: PMCPMC3350598.
- 732 31.Pisitkun T, Shen RF, Knepper MA. Identification and proteomic profiling of exosomes in human  
733 urine. *Proc Natl Acad Sci U S A*. 2004;101(36):13368-73. Epub 2004/08/25. doi:  
734 10.1073/pnas.0403453101. PubMed PMID: 15326289; PubMed Central PMCID: PMCPMC516573.
- 735 32.Babst M, Katzmann DJ, Estepa-Sabal EJ, Meerloo T, Emr SD. Escrt-III: an endosome-associated  
736 heterooligomeric protein complex required for mvb sorting. *Dev Cell*. 2002;3(2):271-82. Epub  
737 2002/08/27. doi: 10.1016/s1534-5807(02)00220-4. PubMed PMID: 12194857.
- 738 33.Wollert T, Hurley JH. Molecular mechanism of multivesicular body biogenesis by ESCRT  
739 complexes. *Nature*. 2010;464(7290):864-U73. doi: 10.1038/nature08849. PubMed PMID:  
740 WOS:000276397300031.
- 741 34.Avalos-Padilla Y, Knorr RL, Javier-Reyna R, Garcia-Rivera G, Lipowsky R, Dimova R, et al. The  
742 Conserved ESCRT-III Machinery Participates in the Phagocytosis of *Entamoeba histolytica*.  
743 *Frontiers in Cellular and Infection Microbiology*. 2018;8. doi: ARTN 5310.3389/fcimb.2018.00053.  
744 PubMed PMID: WOS:000426386400001.
- 745 35.Virtanen JA, Cheng KH, Somerharju P. Phospholipid composition of the mammalian red cell  
746 membrane can be rationalized by a superlattice model. *P Natl Acad Sci USA*. 1998;95(9):4964-9.  
747 doi: DOI 10.1073/pnas.95.9.4964. PubMed PMID: WOS:000073415700034.
- 748 36.Bajorek M, Schubert HL, McCullough J, Langelier C, Eckert DM, Stubblefield WMB, et al.  
749 Structural basis for ESCRT-III protein autoinhibition. *Nature Structural & Molecular Biology*.  
750 2009;16(7):754-U95. doi: 10.1038/nsmb.1621. PubMed PMID: WOS:000267764500014.
- 751 37.Tang SG, Buchkovich NJ, Henne WM, Banjade S, Kim YJ, Emr SD. ESCRT-III activation by parallel  
752 action of ESCRT-I/II and ESCRT-0/Bro1 during MVB biogenesis. *Elife*. 2016;5. doi: ARTN  
753 e1550710.7554/eLife.15507. PubMed PMID: WOS:000376391800001.
- 754 38.Colombo M, Raposo G, Thery C. Biogenesis, Secretion, and Intercellular Interactions of  
755 Exosomes and Other Extracellular Vesicles. *Annual Review of Cell and Developmental Biology*, Vol  
756 30. 2014;30:255-89. doi: 10.1146/annurev-cellbio-101512-122326. PubMed PMID:  
757 WOS:000348434900012.
- 758 39. Babatunde KA, Subramanian BY, Ahouidi AD, Murillo PM, Walch M, Mantel PY. Role of  
759 Extracellular Vesicles in Cellular Cross Talk in Malaria. *Front Immunol*. 2020;11. doi: ARTN  
760 2210.3389/fimmu.2020.00022. PubMed PMID: WOS:000512689100001.
- 761 40.Tiberti N, Latham SL, Bush S, Cohen A, Opoka RO, John CC, et al. Exploring experimental  
762 cerebral malaria pathogenesis through the characterisation of host-derived plasma microparticle  
763 protein content. *Scientific Reports*. 2016;6. doi: 10.1038/srep37871. PubMed PMID:  
764 WOS:000389128900001.
- 765 41.Pain A, Ferguson DJP, Kai O, Urban BC, Lowe B, Marsh K, et al. Platelet-mediated clumping of  
766 *Plasmodium falciparum*-infected erythrocytes is a common adhesive phenotype and is associated  
767 with severe malaria. *Proceedings of the National Academy of Sciences of the United States of*  
768 *America*. 2001;98(4):1805-10. doi: DOI 10.1073/pnas.98.4.1805. PubMed PMID:  
769 WOS:000166949200089.

- 770 42.Mantel PY, Hoang AN, Goldowitz I, Potashnikova D, Hamza B, Vorobjev I, et al. Malaria-Infected  
771 Erythrocyte-Derived Microvesicles Mediate Cellular Communication within the Parasite Population  
772 and with the Host Immune System. *Cell Host & Microbe*. 2013;13(5):521-34. doi:  
773 10.1016/j.chom.2013.04.009. PubMed PMID: WOS:000330850800006.
- 774 43.Regev-Rudzki N, Wilson DW, Carvalho TG, Sisquella X, Coleman BM, Rug M, et al. Cell-Cell  
775 Communication between Malaria-Infected Red Blood Cells via Exosome-like Vesicles. *Cell*.  
776 2013;153(5):1120-33. doi: 10.1016/j.cell.2013.04.029. PubMed PMID: WOS:000319456800018.
- 777 44.Sisquella X, Ofir-Birin Y, Pimentel MA, Cheng L, Abou Karam P, Sampaio NG, et al. Malaria  
778 parasite DNA-harboring vesicles activate cytosolic immune sensors. *Nat Commun*. 2017;8. doi:  
779 ARTN 198510.1038/s41467-017-02083-1. PubMed PMID: WOS:000417336800002.
- 780 45.Colombo M, Moita C, van Niel G, Kowal J, Vigneron J, Benaroch P, et al. Analysis of ESCRT  
781 functions in exosome biogenesis, composition and secretion highlights the heterogeneity of  
782 extracellular vesicles. *Journal of Cell Science*. 2013;126(24):5553-65. doi: 10.1242/jcs.128868.  
783 PubMed PMID: WOS:000328686600003.
- 784 46.Booth AM, Fang Y, Fallon JK, Yang JM, Hildreth JEK, Gould SJ. Exosomes and HIV Gag bud from  
785 endosome-like domains of the T cell plasma membrane. *Journal of Cell Biology*. 2006;172(6):923-  
786 35. doi: DOI 10.1083/jcb.200508014. PubMed PMID: WOS:000235971900017.
- 787 47.Odorizzi G, Katzmann DJ, Babst M, Audhya A, Emr SD. Bro1 is an endosome-associated protein  
788 that functions in the MVB pathway in *Saccharomyces cerevisiae*. *Journal of Cell Science*.  
789 2003;116(10):1893-903. doi: 10.1242/jcs.00395. PubMed PMID: WOS:000183098900005.
- 790 48.Booth A, Marklew CJ, Ciani B, Beales PA. In Vitro Membrane Remodeling by ESCRT is Regulated  
791 by Negative Feedback from Membrane Tension. *Iscience*. 2019;15:173-+. doi:  
792 10.1016/j.isci.2019.04.021. PubMed PMID: WOS:000470104600016.
- 793 49.Mierzwa BE, Chiaruttini N, Redondo-Morata L, von Filseck JM, Konig J, Larios J, et al. Dynamic  
794 subunit turnover in ESCRT-III assemblies is regulated by Vps4 to mediate membrane remodelling  
795 during cytokinesis. *Nature Cell Biology*. 2017;19(7):787-+. doi: 10.1038/ncb3559. PubMed PMID:  
796 WOS:000404408800011.
- 797 50.Adell MAY, Migliano SM, Upadhyayula S, Bykov YS, Sprenger S, Pakdel M, et al. Recruitment  
798 dynamics of ESCRT-III and Vps4 to endosomes and implications for reverse membrane budding.  
799 *Elife*. 2017;6. doi: ARTN e3165210.7554/eLife.31652. PubMed PMID: WOS:000414139400001.
- 800 51.Pelle KG, Ahoudi AD, Mantel PY. Role of microvesicles in malaria infections. *M S-Medecine*  
801 *Sciences*. 2013;29(11):960-2. doi: 10.1051/medsci/20132911010. PubMed PMID:  
802 WOS:000327446400010.
- 803 52.Correa R, Coronado L, Caballero Z, Faral P, Robello C, Spadafora C. Extracellular vesicles carrying  
804 lactate dehydrogenase induce suicide in increased population density of *Plasmodium falciparum* in  
805 vitro. *Sci Rep-Uk*. 2019;9. doi: ARTN 5042  
806 10.1038/s41598-019-41697-x. PubMed PMID: WOS:000462149100006.
- 807 53.Morita E, Sandrin V, Chung HY, Morham SG, Gygi SP, Rodesch CK, et al. Human ESCRT and ALIX  
808 proteins interact with proteins of the midbody and function in cytokinesis. *Embo Journal*.  
809 2007;26(19):4215-27. doi: 10.1038/sj.emboj.7601850. PubMed PMID: WOS:000250466800004.

- 810 54.Lambros C, Vanderberg JP. Synchronization of Plasmodium-Falciparum Erythrocytic Stages in  
811 Culture. *Journal of Parasitology*. 1979;65(3):418-20. doi: Doi 10.2307/3280287. PubMed PMID:  
812 WOS:A1979HK51700015.
- 813 55.Brancucci NMB, Gerdt JP, Wang CQ, De Niz M, Philip N, Adapa SR, et al.  
814 Lysophosphatidylcholine Regulates Sexual Stage Differentiation in the Human Malaria Parasite  
815 Plasmodium falciparum. *Cell*. 2017;171(7):1532-+. doi: 10.1016/j.cell.2017.10.020. PubMed PMID:  
816 WOS:000418044000011.
- 817 56.Portugaliza HP, Llorca-Batlle O, Rosanas-Urgell A, Cortes A. Reporter lines based on the gexp02  
818 promoter enable early quantification of sexual conversion rates in the malaria parasite  
819 Plasmodium falciparum. *Sci Rep-Uk*. 2019;9. doi: ARTN 1459510.1038/s41598-019-50768-y.  
820 PubMed PMID: WOS:000489555200107.
- 821 57.Mehnert AK, Simon CS, Guizetti J. Immunofluorescence staining protocol for STED nanoscopy of  
822 Plasmodium-infected red blood cells. *Molecular and Biochemical Parasitology*. 2019;229:47-52.  
823 doi: 10.1016/j.molbiopara.2019.02.007. PubMed PMID: WOS:000465052800006.
- 824 58.Nahidiazar L, Agronskaia AV, Broertjes J, van den Broek B, Jalink K. Optimizing Imaging  
825 Conditions for Demanding Multi-Color Super Resolution Localization Microscopy. *Plos One*.  
826 2016;11(7). doi: ARTN e015888410.1371/journal.pone.0158884. PubMed PMID:  
827 WOS:000380005400149.
- 828 59.Ghorbal M, Gorman M, Macpherson CR, Martins RM, Scherf A, Lopez-Rubio JJ. Genome editing  
829 in the human malaria parasite Plasmodium falciparum using the CRISPR-Cas9 system. *Nat*  
830 *Biotechnol*. 2014;32(8):819-21. Epub 2014/06/02. doi: 10.1038/nbt.2925. PubMed PMID:  
831 24880488.
- 832 60.Tintó-Font E, Michel-Todó L, Bozdech Z, Cortés A. An ApiAP2 transcription factor drives  
833 protection from febrile temperatures in malaria parasites. *Nature*. 2020:Forthcoming.
- 834 61.Lim MY, LaMonte G, Lee MCS, Reimer C, Tan BH, Corey V, et al. UDP-galactose and acetyl-CoA  
835 transporters as Plasmodium multidrug resistance genes. *Nat Microbiol*. 2016;1:16166. Epub  
836 2016/09/20. doi: 10.1038/nmicrobiol.2016.166. PubMed PMID: 27642791; PubMed Central  
837 PMCID: PMC5575994.
- 838 62.Knuepfer E, Napiorkowska M, van Ooij C, Holder AA. Generating conditional gene knockouts in  
839 Plasmodium - a toolkit to produce stable DiCre recombinase-expressing parasite lines using  
840 CRISPR/Cas9. *Sci Rep*. 2017;7(1):3881. Epub 2017/06/22. doi: 10.1038/s41598-017-03984-3.  
841 PubMed PMID: 28634346; PubMed Central PMCID: PMC5478596.
- 842 63.Rovira-Graells N, Gupta AP, Planet E, Crowley VM, Mok S, Ribas de Pouplana L, et al.  
843 Transcriptional variation in the malaria parasite Plasmodium falciparum. *Genome Res*.  
844 2012;22(5):925-38. Epub 2012/03/15. doi: 10.1101/gr.129692.111. PubMed PMID: 22415456;  
845 PubMed Central PMCID: PMC3337437.
- 846
